# Supplementary material for: Microaggressions Self-Defense: A Role-Playing Workshop for Responding to Microaggressions
Source: Preprints.org preprint supplement (doi:10.20944/preprints201805.0113.v1), 2018-05-07
Supplement: Supplementary file 1 [file supplementary]

ID	familiar	prepared-target-pre	prepared-aggressor-pre	rating	recommend	prepared-target-post	prepared-aggressor-post
8708	5	3	5	4	5	4	4
8366	4	3	3	5	4	3	3
6511	5	4	5	4	3	4	3
9999	4	4	3		5	4	4
9998	4	3	3	4	5	4	4
9419	5	3	3	4	4	4	4
7418	4	3	3	5	5	4	4
4785	4	3	4		5	4	4
6208	5	3	4	4	5	5	4
4294	5	3	3	4	4	3	3
9209	5	2	3		5	4	4
9997	5	3	3		5	4	4
6140	5	4	5	4	5	5	5
9996	5	4	3	3	3	4	3
9995	2	1	2	5	5	3	4
5411	5	1	3		5	3	4
7791	3	2	2	4	4	3	4
9994	3	2	1	5	5	4	3
3847	2	4	1	4	5	4	3
9232	4	3	2	5	5	3	3
5037	3	3	2	4	4	3	3
